# Supplementary material
Source: PubMed Central journal article supplement (PMC10144668)
Supplement: web_material_kwac148.pdf [file web_material_kwac148.pdf]

## Web Material

### **Associations between childhood obesity and pubertal timing stratified by sex and race/ethnicity**

Sara Aghaee, Julianna Deardorff, Charles P. Quesenberry Jr., Louise C. Greenspan, Lawrence H. Kushi, and Ai Kubo

Web Table 1          page 2

Web Table 2          page 3

Web Table 3          page 4

**Web Table 1. Comparison of Characteristics Between Subjects With Complete and Incomplete Data: KPNC Puberty Study (2008-2021)**

|                                    | Complete<br>(n=129,824) |      | Incomplete<br>(n=3,384) |      | <i>P</i> value |
|------------------------------------|-------------------------|------|-------------------------|------|----------------|
|                                    | N                       | %    | N                       | %    |                |
| <b>Sex</b>                         |                         |      |                         |      | 0.46           |
| Girl                               | 61,253                  | 47.2 | 1,575                   | 46.5 |                |
| Boy                                | 68,571                  | 52.8 | 1,809                   | 53.5 |                |
| <b>Birth year</b>                  |                         |      |                         |      | <0.001         |
| 2003                               | 12,599                  | 9.7  | 461                     | 13.6 |                |
| 2004                               | 13,639                  | 10.5 | 412                     | 12.2 |                |
| 2005                               | 14,563                  | 11.2 | 200                     | 5.9  |                |
| 2006                               | 15,003                  | 11.6 | 163                     | 4.8  |                |
| 2007                               | 15,669                  | 12.1 | 326                     | 9.6  |                |
| 2008                               | 15,302                  | 11.8 | 298                     | 8.8  |                |
| 2009                               | 15,513                  | 11.9 | 419                     | 12.4 |                |
| 2010                               | 14,573                  | 11.2 | 435                     | 12.9 |                |
| 2011                               | 12,963                  | 10.0 | 670                     | 19.8 |                |
| <b>Race/ethnicity</b>              |                         |      |                         |      | <0.001         |
| White                              | 46,453                  | 35.8 | 976                     | 28.8 |                |
| Black                              | 9,066                   | 7.0  | 473                     | 14.0 |                |
| Hispanic                           | 32,533                  | 25.1 | 939                     | 27.7 |                |
| Asian/Pacific Islander             | 29,375                  | 22.6 | 623                     | 18.4 |                |
| Other/Unknown                      | 12,397                  | 9.5  | 373                     | 11.0 |                |
| <b>Childhood BMI<sup>a,b</sup></b> |                         |      |                         |      | 0.02           |
| Severe Obesity                     | 3,772                   | 2.9  | 98                      | 2.9  |                |
| Obese                              | 12,928                  | 10.0 | 382                     | 11.3 |                |
| Overweight                         | 18,924                  | 14.6 | 530                     | 15.7 |                |
| Normal weight                      | 89,304                  | 68.8 | 2,259                   | 66.8 |                |
| Underweight                        | 4,896                   | 3.8  | 115                     | 3.4  |                |

<sup>a</sup>Ages 5-6 years

<sup>b</sup>Weight (kg)/height (m)<sup>2</sup>

**Web Table 2. Unadjusted Associations Between Childhood BMI Category and Timing of Puberty in Boys: KPNC Puberty Study (2008-2021)**

| Childhood BMI <sup>a,b</sup> | Gonadarche |      |            |      |            | Pubarche |      |            |      |            |
|------------------------------|------------|------|------------|------|------------|----------|------|------------|------|------------|
|                              | N          | TR   | 95% CL     | HR   | 95% CL     | N        | TR   | 95% CL     | HR   | 95% CL     |
| Severely Obese               | 2,171      | 0.97 | 0.97, 0.98 | 1.28 | 1.19, 1.37 | 2,194    | 0.96 | 0.95, 0.97 | 1.48 | 1.38, 1.59 |
| Obese                        | 7,177      | 0.98 | 0.97, 0.98 | 1.25 | 1.20, 1.30 | 7,232    | 0.97 | 0.96, 0.97 | 1.37 | 1.31, 1.42 |
| Overweight                   | 9,730      | 0.98 | 0.98, 0.99 | 1.17 | 1.13, 1.21 | 9,799    | 0.98 | 0.97, 0.98 | 1.25 | 1.21, 1.29 |
| Normal                       | 46,226     | 1.00 | Referent   | 1.00 | Referent   | 46,540   | 1.00 | Referent   | 1.00 | Referent   |
| Underweight                  | 2,654      | 1.02 | 1.01, 1.03 | 0.83 | 0.78, 0.88 | 2,680    | 1.02 | 1.01, 1.02 | 0.84 | 0.79, 0.90 |

CL: confidence limit; HR: hazard ratio; KPNC: Kaiser Permanente Northern California; TR: time ratio

<sup>a</sup>Ages 5-6 years

<sup>b</sup>Weight (kg)/height (m)<sup>2</sup>

**Web Table 3. Unadjusted Associations Between Childhood BMI Category and Timing of Puberty in Girls: KPNC Puberty Study (2008-2021)**

| Childhood BMI <sup>a,b</sup> | Thelarche |      |            |      |            | Pubarche |      |            |      |            | Menarche <sup>c</sup> |      |            |
|------------------------------|-----------|------|------------|------|------------|----------|------|------------|------|------------|-----------------------|------|------------|
|                              | N         | TR   | 95% CL     | HR   | 95% CL     | N        | TR   | 95% CL     | HR   | 95% CL     | N                     | OR   | 95% CL     |
| Severely Obese               | 1,553     | 0.94 | 0.93, 0.95 | 1.73 | 1.60, 1.88 | 1,535    | 0.92 | 0.92, 0.93 | 1.98 | 1.83, 2.15 | 855                   | 2.95 | 2.57, 3.39 |
| Obese                        | 5,606     | 0.95 | 0.95, 0.96 | 1.52 | 1.46, 1.59 | 5,551    | 0.95 | 0.94, 0.95 | 1.60 | 1.54, 1.68 | 3,241                 | 2.41 | 2.23, 2.60 |
| Overweight                   | 9,003     | 0.96 | 0.96, 0.97 | 1.36 | 1.31, 1.40 | 8,918    | 0.97 | 0.96, 0.97 | 1.32 | 1.27, 1.37 | 5,312                 | 1.70 | 1.60, 1.82 |
| Normal                       | 42,214    | 1.00 | Referent   | 1.00 | Referent   | 41,778   | 1.00 | Referent   | 1.00 | Referent   | 25,114                | 1.00 | Referent   |
| Underweight                  | 2,189     | 1.03 | 1.02, 1.03 | 0.81 | 0.75, 0.86 | 2,172    | 1.02 | 1.01, 1.03 | 0.84 | 0.78, 0.90 | 1,251                 | 0.64 | 0.55, 0.75 |

CL: confidence limit; HR: hazard ratio; KPNC: Kaiser Permanente Northern California; TR: time ratio

<sup>a</sup>Ages 5-6 years

<sup>b</sup>Weight (kg)/height (m)<sup>2</sup>

<sup>c</sup>Probability modeled is menarche <12
